# Supplementary material for: Degradation of gaseous unsymmetrical dimethylhydrazine by vacuum ultraviolet coupled with MnO2
Source: Royal Society of Chemistry journal article supplement (doi:10.1039/d0nj05167e), 2020-12-09
Supplement: d0nj05167e1.pdf [file d0nj05167e1.pdf]

## Supporting Information

### Degradation of gaseous unsymmetrical dimethylhydrazine by vacuum ultraviolet coupled with MnO<sub>2</sub>

Yuanzheng Huang, Ying Jia, Keke Shen, Ruomeng Hou, Yongyong Zhang and Li'an Hou\*

Xi'an High Technology Institute, Xi'an 710025, China.

#### Corresponding Author\*

\*E-mail: [houlia09@sina.com](mailto:houlia09@sina.com)

Table S1 Main identified organic intermediates in VUV photolysis process at air and N<sub>2</sub> atmosphere under RH=0 and 50%

| Rank<br>by<br>intensi<br>ty | N <sub>2</sub> +VUV                   |                             |                                       |                             | Air+VUV                               |                             |                                       |                             |
|-----------------------------|---------------------------------------|-----------------------------|---------------------------------------|-----------------------------|---------------------------------------|-----------------------------|---------------------------------------|-----------------------------|
|                             | RH=0%                                 |                             | RH=50%                                |                             | RH=0%                                 |                             | RH=50%                                |                             |
|                             | Possible<br>Compound                  | Correspondi<br>ng Structure |
| 1                           | Formaldehyde<br>dimethylhydraz<br>one |                             | Formaldehyde<br>dimethylhydraz<br>one |                             | Formaldehyde<br>dimethylhydraz<br>one |                             | Formaldehyde<br>dimethylhydraz<br>one |                             |
| 2                           | Dimethylamine                         |                             | N-nitroso<br>dimethylamine            |                             | N-nitroso<br>dimethylamine            |                             | N-nitroso<br>dimethylamine            |                             |
| 3                           |                                       |                             | Dimethylamine                         |                             | Dimethylamine                         |                             | Dimethylamine                         |                             |
| 4                           |                                       |                             |                                       |                             | N-<br>methylformami<br>de             |                             | N-<br>methylformami<br>de             |                             |
| 5                           |                                       |                             |                                       |                             | Dimethylnitram<br>ine                 |                             | Dimethylnitram<br>ine                 |                             |

Table S2 Main identified organic intermediates in VUV/MnO<sub>2</sub> process at air under RH= 50%

|           |                                | VUV/MnO <sub>2</sub>       |                         |                                |                         |                                |                         |
|-----------|--------------------------------|----------------------------|-------------------------|--------------------------------|-------------------------|--------------------------------|-------------------------|
|           |                                | $\alpha$ -MnO <sub>2</sub> |                         | $\beta$ -MnO <sub>2</sub>      |                         | $\delta$ -MnO <sub>2</sub>     |                         |
| Rank by   |                                | Possible Compound          | Corresponding Structure | Possible Compound              | Corresponding Structure | Possible Compound              | Corresponding Structure |
| intensity |                                |                            |                         |                                |                         |                                |                         |
| 1         | Formaldehyde dimethylhydrazone |                            |                         | Formaldehyde dimethylhydrazone |                         | Formaldehyde dimethylhydrazone |                         |
| 2         | N-nitroso dimethylamine        |                            |                         | N-nitroso dimethylamine        |                         | Dimethylaminoacetonitrile      |                         |
| 3         | Dimethylaminoacetonitrile      |                            |                         | Dimethylaminoacetonitrile      |                         | N-nitroso dimethylamine        |                         |
| 4         | Succinaldehyde                 |                            |                         | Succinaldehyde                 |                         | Succinaldehyde                 |                         |
| 5         | N-methylformamide              |                            |                         | 1,3-oxazolidine                |                         | 1,3-oxazolidine                |                         |
| 6         | Dimethylamine                  |                            |                         | N-methylformamide              |                         | N-methylformamide              |                         |
| 7         | 1,3-oxazolidine                |                            |                         | Dimethylamine                  |                         | Dimethylamine                  |                         |
| 8         | Dimethylnitramine              |                            |                         | Dimethylnitramine              |                         | Dimethylnitramine              |                         |
